# Supplementary material for: LAMTOR1 regulates dendritic lysosomal positioning in hippocampal neurons through TRPML1 inhibition
Source: Front Cell Neurosci. 2024 Nov 22;18:1495546. doi: 10.3389/fncel.2024.1495546 (PMC11621854; doi:10.3389/fncel.2024.1495546)
Supplement: Supplementary file 2 [file Table_2.XLSX]

## Sheet: Fig. 1B
	shSc																		shLAMTOR1
0-5	121.294	14.1143	18.6935	72.9214	51.4688	30.5731	27.6526	15.5993	44.5166	68.2289	25.6967	89.1762	98.3496	38.7922	18.3801	32.8958	32.3001		196.666	153.833	132.234	28.3914	103.608	250.821	89.5215	47.2165	52.1389	51.8048	141.061	182.814	109.939	57.0692	87.2372	90.2417	118.767	67.4705
5-10	106.988	8.72869	6.72317	59.9015	27.4217	45.9908	31.3293	12.2396	45.615	58.915	26.1896	35.4348	43.1759	52.7946	26.6743	20.3114	26.6124		173.709	143.782	48.9237	37.4013	78.8566	210.116	48.0301	91.9794	30.0391	60.4711	113.776	110.155	83.6063	31.5411	109.824	105.407	104.598	80.8241
10-15	109.199	10.7694	3.63032	65.3535	16.9123	80.9168	19.8684	18.7963	52.4118	56.6439	14.4668	21.1533	23.4412	16.6004	39.8035	17.3528	11.5299		125.816	83.192	48.4317	58.3449	69.9531	152.263	65.6279	75.4866	69.5011	26.7191	113.873	140.986	22.3908	28.4704	43.781	98.9199	93.4853	95.0255
15-20	94.9981	8.86921	2.68949	55.7244	14.3506	37.1076	16.9563	25.8698	28.0955	51.6945	19.7731	12.3663	13.6927	45.6756	29.0067	17.4926	12.3515		107.874	47.083	33.8517	25.1939	67.1073	133.941	25.7998	79.8308	75.073	16.0497	47.7294	122.968	29.5311	20.4034	32.3394	40.1583	70.0097	43.6729
20-25	78.5637	5.63861	2.66494	41.1892	16.8124	29.4051	26.3272	17.7588	22.2722	23.1948	15.036	10.504	10.9922	18.0659	22.9029	23.4509	16.1747		91.4971	41.8466	25.4155	18.6391	48.8004	88.2096	31.4447	63.6865	51.6126	16.2037	47.6324	41.5613	17.263	13.1746	21.5781	24.7411	95.6777	24.6604
25-30	65.4763	7.54016	3.7548	45.8814	10.4806	26.797	22.5417	15.9404	27.3711	13.8517	13.2758	17.2642	17.5227	14.7043	15.219	27.3107	16.6956		72.6838	47.5199	8.30783	9.05369	65.8618	81.8807	17.7453	44.8014	33.3963	19.6055	50.8302	18.9211	10.7988	14.4623	35.0419	41.8482	40.8528	13.3559
30-35	65.1568	10.1872	3.59334	38.6683	11.5477	15.0483	12.6226	14.9157	27.3909	27.0166	4.66163	15.6018	16.3459	12.8671	11.4209	12.4931	15.2954		60.7968	49.4905	7.60637	6.90167	67.8471	66.0942	25.4576	32.487	32.4843	14.2622	46.5448	17.1825	15.3526	22.3949	27.729	20.9332	86.867	27.9344
35-40	67.0663	6.13531	2.08674	32.9929	9.85999	18.4431	16.6033	20.7283	20.7715	49.2564	5.22699	11.092	11.2041	14.8089	15.9458	9.24198	9.95856		121.306	46.5996	4.85989	15.7031	53.0064	61.2691	27.7928	56.6119	13.3744	16.8501	30.8277	33.697	18.2314	11.4974	34.8032	25.7698	78.889	27.9845
40-45	52.2118	12.9647	2.31711	37.5336	5.03952	17.3479	16.3512	15.0487	30.9351	17.85	11.4791	6.53143	8.41136	19.7792	12.643	14.1548	10.5426		41.9089	35.6221	8.31193	6.62731	43.0814	65.6378	20.3316	21.1718	11.2967	16.8315	38.5955	16.2686	22.9357	18.9146	21.7043	8.42626	62.4838	21.043
45-50	62.7142	6.10181	2.56972	51.1996	11.1201	16.6673	13.7319	8.37544	6.20846	10.1331	12.4107	6.03588	7.44001	21.2888	9.21676	18.1041	7.79821		38.0007	46.9169	12.4592	5.30732	46.3031	54.5177	12.7127	38.738	16.7217	22.9128	27.6029	11.0713	12.3258	19.57	37.8499	36.0921	44.572	17.6182
50-55	53.2576	5.20588	2.83404	42.2776	6.02376	17.29	17.1321	10.7074	6.04769	15.7882	11.6503	5.96497	4.88721	11.1445	9.06098	5.95749	7.2765		43.0061	44.3066	9.47952	3.73964	51.2968	58.1943	10.4561	18.8249	34.2204	18.8895	28.9318	18.3661	7.11114	18.7326	26.1045	28.0593	49.5471	14.7236
55-60	69.9379	3.95241	2.21531	35.5684	5.30723	10.2999	19.2945	19.9998	13.5969	23.4158	3.10491	11.796	12.8141	6.71443	7.31665	15.162	8.69608		54.0675	44.8816	4.10471	3.39373	28.9121	59.7037	14.1384	14.9058	32.0338	12.6601	30.0445	18.7958	8.55481	18.1024	23.2297	11.713	76.5298	14.9959

## Sheet: Fig. 1D
	shSc																		shLAMTOR1
0-5	33.7904	46.9509	54.2599	72.6294	84.0162	82.6028	75.9654	52.81	106.779	38.8686	53.3753	37.6004	69.9587	52.4877					156.696	78.0753	86.1915	104.187	106.272	132.329	54.0753	85.4238	140.553	98.3104	78.2186	82.5113	84.0937	144.267	104.352	86.4917	68.5318
5-10	55.8939	41.152	52.0816	98.7837	57.8996	71.4067	46.6063	31.5542	69.7517	51.9679	42.4344	24.9629	52.06	41.1236					111.514	74.5643	85.0496	93.9765	75.7099	148.688	54.5092	48.6127	142.114	94.2359	67.9539	86.2146	78.4501	167.895	53.6275	78.9262	58.2556
10-15	48.6105	36.8598	40.2959	74.0628	31.827	45.9045	38.8406	37.759	60.3423	31.1562	38.7714	20.4294	36.5742	28.6611					69.0151	68.782	70.3926	65.1907	69.717	117.611	38.0691	38.1083	80.6804	74.8149	43.3139	50.4713	52.2297	95.5643	56.0648	24.8191	36.5949
15-20	66.0265	40.2253	40.9935	41.5549	52.9512	55.6786	37.1545	29.144	55.8178	28.2183	51.8081	29.3467	29.0141	18.7755					104.182	73.8937	65.1858	69.8862	76.8372	106.04	43.5414	51.6483	61.5255	45.9877	53.3844	35.4207	46.2914	106.739	31.2865	37.5696	50.6813
20-25	54.6814	27.792	31.7318	50.2235	46.378	57.9156	31.0426	30.3895	51.2646	32.316	24.5186	25.9524	22.8265	20.6537					72.4714	70.1816	64.8827	45.139	58.6244	90.5133	35.1927	42.8878	53.2935	56.9737	58.1708	38.3905	51.006	74.8297	33.0324	26.0162	48.4752
25-30	20.881	40.1755	28.9477	33.6713	27.9905	36.6552	26.7373	69.3226	47.1974	23.7833	20.3617	27.6347	27.1265	11.6176					64.7258	52.8264	57.6262	38.3102	51.0663	59.5818	31.7922	27.8729	60.7141	49.7468	53.7502	34.8058	47.6803	80.9979	48.7059	32.1161	25.7622
30-35	24.4803	36.4253	30.9824	34.587	24.902	28.7587	33.0898	30.7102	49.6337	32.9797	33.3422	23.3553	36.5138	15.0622					54.304	60.1917	68.2067	44.1031	43.1716	44.7824	32.6399	31.0963	64.3134	51.5793	41.5123	34.5536	48.655	51.0199	57.0934	35.496	23.905
35-40	7.46725	26.0167	26.0049	23.2629	21.3122	21.4797	28.9647	18.0604	52.4454	34.591	29.4402	23.0467	22.4326	16.295					48.4965	44.4762	52.3556	25.345	35.24	37.8728	23.7554	34.6652	57.0552	66.2248	34.4074	32.002	35.6215	38.1822	25.0994	27.1869	29.8215
40-45	13.2701	28.7206	25.4724	21.7043	15.1091	29.8596	29.4762	10.2964	37.0917	28.8337	40.7943	26.7691	29.7966	16.7308					57.1239	43.9203	55.1494	20.58	46.3331	35.9336	22.9357	33.3179	60.426	47.4813	34.9143	30.0443	46.3547	39.5491	21.1285	22.8517	22.1261
45-50	9.08361	20.1385	13.7194	22.9711	11.9977	42.1819	25.809	8.42866	42.3065	24.8113	18.7955	23.1005	25.0606	17.9778					77.5254	58.8277	72.4591	22.7233	57.6184	36.2502	16.1292	20.9123	48.879	46.1192	32.1935	31.846	54.9346	49.8641	21.3324	22.3508	14.196
50-55	51.1481	50.151	15.4774	30.889	15.9672	17.3611	24.4176	14.8106	49.7585	47.2768	16.6295	15.0527	21.1394	19.8778					40.3925	43.6044	68.0136	29.9769	48.8393	25.8063	23.602	26.9033	46.7803	34.4273	35.4751	17.6703	33.1621	34.5409	13.5664	29.1142	17.6169
55-60	9.17418	23.2628	12.4248	30.9572	18.8612	20.6862	58.489	8.52671	38.4456	28.6486	21.4989	9.90638	14.9328	13.9782					30.1328	37.3218	51.9634	25.0167	28.8823	22.3743	14.2769	28.8194	66.2822	45.556	23.0401	14.7703	30.7572	25.7675	19.2584	22.5769	11.0077

## Sheet: Fig. 2B
	shSc															shLAMTOR2
0-5	14.1143	18.6935	41.7755	30.5731	27.6526	15.5993	51.4688	44.5166								66.7639	93.6509	89.34	68.8576	130.809	31.2514	43.3006	73.6589	148.267	77.8024	64.8638
5-10	8.72869	6.72317	41.815	45.9908	31.3293	12.2396	27.4217	45.615								44.3879	58.1961	41.4279	58.1832	41.3831	62.0075	31.0428	69.7459	78.6401	51.0715	103.564
10-15	10.7694	3.63032	34.8043	80.9168	19.8684	18.7963	16.9123	52.4118								64.8614	42.1922	29.8845	27.6582	68.0107	38.6958	32.1332	49.9485	85.4132	32.6069	60.9143
15-20	8.86921	2.68949	17.9747	37.1076	16.9563	25.8698	14.3506	28.0955								41.6571	23.2578	27.8444	12.1363	100.441	25.9932	20.8882	78.1764	62.3317	35.8836	46.3876
20-25	5.63861	2.66494	39.2146	29.4051	26.3272	17.7588	16.8124	22.2722								20.7247	18.8379	15.4653	29.2629	52.8673	46.222	21.2913	61.3073	80.9346	56.6281	31.2169
25-30	7.54016	3.7548	20.9439	26.797	22.5417	15.9404	10.4806	27.3711								36.1966	9.06867	17.484	5.91897	39.6985	49.0839	21.3741	34.6266	29.0199	26.4956	22.242
30-35	10.1872	3.59334	6.62367	15.0483	12.6226	14.9157	11.5477	27.3909								12.0442	10.1512	18.4717	7.48197	43.1715	21.9629	23.0983	27.0958	45.3675	19.4563	29.3238
35-40	6.13531	2.08674	10.4602	18.4431	16.6033	20.7283	9.85999	20.7715								7.97852	8.54711	16.5794	16.1866	30.8062	33.645	7.50354	26.5132	20.5032	44.4317	24.2874
40-45	12.9647	2.31711	7.23479	17.3479	16.3512	15.0487	5.03952	30.9351								9.8021	3.75892	17.2578	10.2854	23.1871	25.4333	3.45078	46.4403	29.2711	38.9189	18.2371
45-50	6.10181	2.56972	7.27386	16.6673	13.7319	8.37544	11.1201	6.20846								9.97952	2.86844	29.5252	7.1278	27.3152	18.2834	8.22006	21.2718	12.6336	14.1923	24.5916
50-55	5.20588	2.83404	9.16809	17.29	17.1321	10.7074	6.02376	6.04769								28.5808	7.25681	9.89288	10.0451	27.4916	21.6484	16.7899	35.6426	12.3536	36.7505	21.8529
55-60	3.95241	2.21531	17.0392	10.2999	19.2945	19.9998	5.30723	13.5969								5.9902	14.2224	5.38227	11.4574	17.605	18.5431	6.3136	25.8623	15.4044	10.0334	11.0844

## Sheet: Fig. 2D
	DMSO												Torin 1
0-5	63.8391	61.336	37.6943	97.256	74.3259	20.9139							85.359	35.4738	103.526	87.8476	13.3211	22.3645	85.6657	134.371	106.734	25.4314	13.6916	29.6838
5-10	24.9816	64.4859	22.4881	33.7113	17.9418	17.9607							22.2237	25.8803	46.7252	21.9644	9.04256	12.5652	48.3879	63.1487	33.4149	10.3659	5.9547	15.6193
10-15	24.4324	20.6019	14.8871	16.9212	16.3373	10.5619							9.72723	16.6096	30.0538	22.3763	5.74518	11.5176	31.4284	29.0193	18.7534	9.08435	9.27155	14.5896
15-20	24.6862	18.6397	6.62475	12.3088	14.3756	15.5013							7.19329	22.8213	20.1119	18.6519	3.6326	10.359	20.3467	19.0592	11.8285	9.01742	18.9616	11.476
20-25	28.1153	14.1795	7.79723	14.0323	14.4496	11.0852							8.14845	35.6883	17.299	19.5252	7.03257	8.5115	15.1064	11.2993	9.43258	7.87048	28.9814	11.0743
25-30	16.8927	20.2897	6.20811	6.07689	18.1339	6.04226							10.9279	22.4659	7.91402	12.6629	7.60623	5.92272	9.79106	8.58178	6.78942	6.24843	8.42491	9.01645
30-35	31.9553	13.9809	4.10704	6.58339	24.875	11.5474							4.93361	23.3803	7.71094	17.9034	7.7903	6.29845	9.93383	11.1852	14.6622	8.51452	5.61215	9.60847
35-40	11.1669	11.9194	8.8413	4.46275	16.3281	13.005							6.36854	11.1821	8.79976	16.7472	10.0462	8.2954	7.86973	16.9084	14.3695	4.69331	4.32452	5.0153

## Sheet: Fig. 3A
	shSc																		shLAMTOR1																			shSc+ML-SI1
0-5	121.294	14.1143	18.6935	72.9214	51.4688	30.5731	27.6526	15.5993	44.5166	68.2289	25.6967	89.1762	98.3496	38.7922	18.3801	32.8958	32.3001		196.666	153.833	132.234	28.3914	103.608	250.821	89.5215	47.2165	52.1389	51.8048	141.061	182.814	109.939	57.0692	87.2372	90.2417	118.767	67.4705		35.4629	58.6126	23.3274	35.8373	33.5346	17.4551
5-10	106.988	8.72869	6.72317	59.9015	27.4217	45.9908	31.3293	12.2396	45.615	58.915	26.1896	35.4348	43.1759	52.7946	26.6743	20.3114	26.6124		173.709	143.782	48.9237	37.4013	78.8566	210.116	48.0301	91.9794	30.0391	60.4711	113.776	110.155	83.6063	31.5411	109.824	105.407	104.598	80.8241		47.4569	59.367	32.8179	7.84409	19.0529	19.3206
10-15	109.199	10.7694	3.63032	65.3535	16.9123	80.9168	19.8684	18.7963	52.4118	56.6439	14.4668	21.1533	23.4412	16.6004	39.8035	17.3528	11.5299		125.816	83.192	48.4317	58.3449	69.9531	152.263	65.6279	75.4866	69.5011	26.7191	113.873	140.986	22.3908	28.4704	43.781	98.9199	93.4853	95.0255		40.1613	38.4526	11.8055	32.576	30.1955	23.3644
15-20	94.9981	8.86921	2.68949	55.7244	14.3506	37.1076	16.9563	25.8698	28.0955	51.6945	19.7731	12.3663	13.6927	45.6756	29.0067	17.4926	12.3515		107.874	47.083	33.8517	25.1939	67.1073	133.941	25.7998	79.8308	75.073	16.0497	47.7294	122.968	29.5311	20.4034	32.3394	40.1583	70.0097	43.6729		30.1053	19.6331	23.4294	5.48202	23.1162	12.483
20-25	78.5637	5.63861	2.66494	41.1892	16.8124	29.4051	26.3272	17.7588	22.2722	23.1948	15.036	10.504	10.9922	18.0659	22.9029	23.4509	16.1747		91.4971	41.8466	25.4155	18.6391	48.8004	88.2096	31.4447	63.6865	51.6126	16.2037	47.6324	41.5613	17.263	13.1746	21.5781	24.7411	95.6777	24.6604		23.5322	19.3031	28.6867	8.80669	19.2962	7.94677
25-30	65.4763	7.54016	3.7548	45.8814	10.4806	26.797	22.5417	15.9404	27.3711	13.8517	13.2758	17.2642	17.5227	14.7043	15.219	27.3107	16.6956		72.6838	47.5199	8.30783	9.05369	65.8618	81.8807	17.7453	44.8014	33.3963	19.6055	50.8302	18.9211	10.7988	14.4623	35.0419	41.8482	40.8528	13.3559		13.8831	21.429	44.5207	10.623	9.14726	8.12662
30-35	65.1568	10.1872	3.59334	38.6683	11.5477	15.0483	12.6226	14.9157	27.3909	27.0166	4.66163	15.6018	16.3459	12.8671	11.4209	12.4931	15.2954		60.7968	49.4905	7.60637	6.90167	67.8471	66.0942	25.4576	32.487	32.4843	14.2622	46.5448	17.1825	15.3526	22.3949	27.729	20.9332	86.867	27.9344		18.9361	22.5882	31.5273	7.87062	6.45319	10.4515
35-40	67.0663	6.13531	2.08674	32.9929	9.85999	18.4431	16.6033	20.7283	20.7715	49.2564	5.22699	11.092	11.2041	14.8089	15.9458	9.24198	9.95856		121.306	46.5996	4.85989	15.7031	53.0064	61.2691	27.7928	56.6119	13.3744	16.8501	30.8277	33.697	18.2314	11.4974	34.8032	25.7698	78.889	27.9845		16.4082	19.5303	23.4171	9.27314	15.662	8.59601
40-45	52.2118	12.9647	2.31711	37.5336	5.03952	17.3479	16.3512	15.0487	30.9351	17.85	11.4791	6.53143	8.41136	19.7792	12.643	14.1548	10.5426		41.9089	35.6221	8.31193	6.62731	43.0814	65.6378	20.3316	21.1718	11.2967	16.8315	38.5955	16.2686	22.9357	18.9146	21.7043	8.42626	62.4838	21.043		24.2442	10.0433	13.1173	6.9908	7.23245	6.89115
45-50	62.7142	6.10181	2.56972	51.1996	11.1201	16.6673	13.7319	8.37544	6.20846	10.1331	12.4107	6.03588	7.44001	21.2888	9.21676	18.1041	7.79821		38.0007	46.9169	12.4592	5.30732	46.3031	54.5177	12.7127	38.738	16.7217	22.9128	27.6029	11.0713	12.3258	19.57	37.8499	36.0921	44.572	17.6182		34.0028	14.0854	7.47241	5.21908	9.66903	8.5619
50-55	53.2576	5.20588	2.83404	42.2776	6.02376	17.29	17.1321	10.7074	6.04769	15.7882	11.6503	5.96497	4.88721	11.1445	9.06098	5.95749	7.2765		43.0061	44.3066	9.47952	3.73964	51.2968	58.1943	10.4561	18.8249	34.2204	18.8895	28.9318	18.3661	7.11114	18.7326	26.1045	28.0593	49.5471	14.7236		12.8945	6.7276	7.41457	5.62014	9.87847	6.53966
55-60	69.9379	3.95241	2.21531	35.5684	5.30723	10.2999	19.2945	19.9998	13.5969	23.4158	3.10491	11.796	12.8141	6.71443	7.31665	15.162	8.69608		54.0675	44.8816	4.10471	3.39373	28.9121	59.7037	14.1384	14.9058	32.0338	12.6601	30.0445	18.7958	8.55481	18.1024	23.2297	11.713	76.5298	14.9959		19.0245	10.6984	4.89298	4.61919	10.7113	7.95735

## Sheet: Fig. 3B
	shSc/Accell siControl										shLAMTOR1/Accell siControl										shSc/Accell siTRPML1										shLAMTOR1/Accell siTRPML1
0-5	21.1905	115.08	69.4048	36.8001	23.669	65.9336	83.819	45.259	28.2848		80.6421	118.565	108.365	92.2171	88.535	126.643	117.046	92.0952			31.2124	26.3463	17.9606	30.973	61.109	80.3718	54.042	44.0907			54.381	74.8088	28.7767	91.4026	13.8467	14.5979	21.3604	23.4404	26.9648
5-10	5.57977	62.174	50.6239	43.6201	16.2981	32.7844	37.7095	40.0571	26.91		76.808	165.534	91.9916	46.0043	61.4141	59.2884	51.4607	48.3371			26.4688	18.9766	8.81799	11.4991	32.9973	22.9178	30.8639	25.7483			71.0395	67.539	12.6626	30.8626	15.3371	32.9746	25.0794	24.9764	24.3914
10-15	13.639	35.927	51.5724	8.43014	12.7818	24.1702	69.5683	32.5979	14.8472		19.1199	107.124	85.7902	39.3172	80.1019	29.9354	25.1406	46.6064			20.1835	9.89818	24.2818	27.2523	16.8874	13.5423	35.6018	24.4187			77.2193	27.4836	6.3191	33.0874	7.2263	31.7455	24.2277	30.4594	10.8372
15-20	33.3183	22.6699	7.09696	12.1808	22.627	39.5195	29.5201	28.6555	11.6559		9.26634	107.515	57.4142	42.4299	49.9136	25.3241	33.8908	52.9717			16.9577	7.87688	19.3202	7.20097	29.3801	37.1901	10.5774	11.9908			51.2042	25.2471	14.8774	11.5201	27.8254	8.26895	11.4274	9.71372	24.3042
20-25	10.6959	14.8796	50.3855	22.4609	11.7492	31.109	38.7793	30.3405	21.2173		15.3718	79.3235	68.4837	68.1643	89.0214	24.6655	10.8719	68.5498			23.1359	6.95722	15.3843	14.5206	26.4384	30.4545	22.3334	10.8017			82.1129	35.4143	26.8606	22.2947	26.63	5.37319	55.6051	11.9054	29.8871
25-30	7.50643	11.1619	20.4266	8.07921	26.1586	17.5675	26.0984	17.9838	10.1465		11.7386	94.3469	28.3892	14.6364	59.5981	19.2095	20.0475	27.6348			12.27	8.70195	13.0775	9.88842	10.4277	16.5851	16.3951	9.2002			72.6017	16.2298	4.48355	8.4091	34.1821	6.3825	7.57963	19.7229	7.74636
30-35	9.90723	24.7074	7.87358	4.86493	8.4694	13.1964	16.1348	15.2889	11.2151		34.9411	7.39429	23.3109	10.5932	95.0522	15.8026	17.0712	30.9945			15.2431	9.57034	22.7685	17.2624	6.04699	15.5577	17.6491	11.1962			22.2283	14.5779	12.1247	3.41957	11.5929	7.98541	5.48521	17.1789	32.9642
35-40	3.78115	39.6914	16.6466	4.82024	7.21037	7.33796	6.83247	15.9359	10.8503		9.75361	11.7833	5.758	21.4003	36.7429	8.33272	14.6655	22.8052			35.348	17.8039	7.45309	7.09207	27.2962	7.17121	17.3045	7.73835			23.2059	21.5316	11.1516	7.88985	5.81751	8.11709	16.8089	17.0764	3.54775
40-45	6.46924	14.1655	16.8471	2.2789	18.8622	4.69215	13.297	16.2575	18.7778		25.9467	5.72166	14.2633	19.9606	80.2437	16.6366	13.4771	24.8495			8.35299	5.0228	16.0529	11.8229	44.9062	22.973	10.6857	6.70158			21.667	24.7086	8.08266	4.24203	13.0991	5.80273	8.46114	14.8876	8.22373
45-50	10.413	10.3822	4.86823	10.2799	8.20715	31.1099	21.2216	19.5493	45.458		8.98615	9.57705	34.9457	11.1953	16.4674	8.50702	21.3746	28.1881			11.2249	4.17647	14.2528	6.90312	33.0793	21.8868	17.3842	32.6823			38.7392	8.32811	12.7673	3.1407	11.8421	2.5174	5.14408	24.104	37.1444
50-55	4.00005	11.3587	6.42535	11.4647	14.4766	14.7581	34.9651	9.30308	5.06515		2.78573	25.8067	23.1461	10.9132	13.456	7.74807	8.27845	25.3733			8.71776	6.30159	10.1861	9.21352	33.2447	15.4904	14.7169	6.75209			66.8575	13.9903	14.0467	4.95294	4.63939	3.50448	5.45281	12.0206	14.2944
55-60	3.31525	26.9542	61.2954	5.06008	16.4152	6.52594	21.6678	7.3561	3.06663		32.9573	5.28064	13.9021	40.8457	22.6026	24.1951	7.56704	22.6605			14.5979	10.5589	8.23207	4.32083	8.23402	1.47571	9.32517	7.73292			28.3565	19.2084	16.1845	10.8798	4.20998	3.89164	4.09339	4.27724	16.3537

## Sheet: Fig. 4A
	shSc																		shLAMTOR1																		shSc+ML-SA1
0-5	121.294	14.1143	18.6935	72.9214	51.4688	30.5731	27.6526	15.5993	44.5166	68.2289	25.6967	89.1762	98.3496	38.7922	18.3801	32.8958	32.3001		196.666	153.833	132.234	28.3914	103.608	250.821	89.5215	47.2165	52.1389	51.8048	141.061	182.814	109.939	57.0692	87.2372	90.2417	118.767	67.4705	91.5918	117.856	66.0403	118.206	86.1314	47.88	158.678	164.342	81.6646	101.834	93.6955	115.778
5-10	106.988	8.72869	6.72317	59.9015	27.4217	45.9908	31.3293	12.2396	45.615	58.915	26.1896	35.4348	43.1759	52.7946	26.6743	20.3114	26.6124		173.709	143.782	48.9237	37.4013	78.8566	210.116	48.0301	91.9794	30.0391	60.4711	113.776	110.155	83.6063	31.5411	109.824	105.407	104.598	80.8241	84.9824	73.6804	42.9559	75.7033	70.721	31.004	39.8576	67.1037	70.0789	41.1743	73.0934	71.3479
10-15	109.199	10.7694	3.63032	65.3535	16.9123	80.9168	19.8684	18.7963	52.4118	56.6439	14.4668	21.1533	23.4412	16.6004	39.8035	17.3528	11.5299		125.816	83.192	48.4317	58.3449	69.9531	152.263	65.6279	75.4866	69.5011	26.7191	113.873	140.986	22.3908	28.4704	43.781	98.9199	93.4853	95.0255	52.5746	79.4271	49.8756	88.6201	30.8882	38.217	74.7523	88.5887	76.2562	61.7287	52.697	50.4748
15-20	94.9981	8.86921	2.68949	55.7244	14.3506	37.1076	16.9563	25.8698	28.0955	51.6945	19.7731	12.3663	13.6927	45.6756	29.0067	17.4926	12.3515		107.874	47.083	33.8517	25.1939	67.1073	133.941	25.7998	79.8308	75.073	16.0497	47.7294	122.968	29.5311	20.4034	32.3394	40.1583	70.0097	43.6729	22.9153	42.3755	32.706	47.9206	31.3262	27.1266	14.2669	68.1976	83.843	37.6399	32.4307	41.5735
20-25	78.5637	5.63861	2.66494	41.1892	16.8124	29.4051	26.3272	17.7588	22.2722	23.1948	15.036	10.504	10.9922	18.0659	22.9029	23.4509	16.1747		91.4971	41.8466	25.4155	18.6391	48.8004	88.2096	31.4447	63.6865	51.6126	16.2037	47.6324	41.5613	17.263	13.1746	21.5781	24.7411	95.6777	24.6604	26.6003	15.171	16.5262	34.6862	22.4243	21.8394	4.53887	33.7426	85.417	17.6117	21.1436	22.5281
25-30	65.4763	7.54016	3.7548	45.8814	10.4806	26.797	22.5417	15.9404	27.3711	13.8517	13.2758	17.2642	17.5227	14.7043	15.219	27.3107	16.6956		72.6838	47.5199	8.30783	9.05369	65.8618	81.8807	17.7453	44.8014	33.3963	19.6055	50.8302	18.9211	10.7988	14.4623	35.0419	41.8482	40.8528	13.3559	16.4052	21.6603	24.7606	27.0783	22.7118	28.4006	14.4158	47.151	44.9134	22.9719	11.7908	12.8847
30-35	65.1568	10.1872	3.59334	38.6683	11.5477	15.0483	12.6226	14.9157	27.3909	27.0166	4.66163	15.6018	16.3459	12.8671	11.4209	12.4931	15.2954		60.7968	49.4905	7.60637	6.90167	67.8471	66.0942	25.4576	32.487	32.4843	14.2622	46.5448	17.1825	15.3526	22.3949	27.729	20.9332	86.867	27.9344	14.7773	23.9731	20.6406	31.543	18.9931	13.804	11.9224	22.5997	16.9155	40.1769	15.9573	24.5584
35-40	67.0663	6.13531	2.08674	32.9929	9.85999	18.4431	16.6033	20.7283	20.7715	49.2564	5.22699	11.092	11.2041	14.8089	15.9458	9.24198	9.95856		121.306	46.5996	4.85989	15.7031	53.0064	61.2691	27.7928	56.6119	13.3744	16.8501	30.8277	33.697	18.2314	11.4974	34.8032	25.7698	78.889	27.9845	10.6643	13.3673	23.7718	24.0955	14.0175	11.936	8.54238	31.6822	18.5154	17.2543	14.9002	11.8516
40-45	52.2118	12.9647	2.31711	37.5336	5.03952	17.3479	16.3512	15.0487	30.9351	17.85	11.4791	6.53143	8.41136	19.7792	12.643	14.1548	10.5426		41.9089	35.6221	8.31193	6.62731	43.0814	65.6378	20.3316	21.1718	11.2967	16.8315	38.5955	16.2686	22.9357	18.9146	21.7043	8.42626	62.4838	21.043	13.6979	6.4186	14.1574	16.5473	13.4129	22.1592	10.4613	28.7425	13.2883	16.0933	6.77376	24.5577
45-50	62.7142	6.10181	2.56972	51.1996	11.1201	16.6673	13.7319	8.37544	6.20846	10.1331	12.4107	6.03588	7.44001	21.2888	9.21676	18.1041	7.79821		38.0007	46.9169	12.4592	5.30732	46.3031	54.5177	12.7127	38.738	16.7217	22.9128	27.6029	11.0713	12.3258	19.57	37.8499	36.0921	44.572	17.6182	11.3429	3.35671	11.6679	15.6988	7.56603	41.067	8.10966	26.8314	23.7429	17.3778	7.06613	34.4934
50-55	53.2576	5.20588	2.83404	42.2776	6.02376	17.29	17.1321	10.7074	6.04769	15.7882	11.6503	5.96497	4.88721	11.1445	9.06098	5.95749	7.2765		43.0061	44.3066	9.47952	3.73964	51.2968	58.1943	10.4561	18.8249	34.2204	18.8895	28.9318	18.3661	7.11114	18.7326	26.1045	28.0593	49.5471	14.7236	15.5863	5.58957	17.2375	16.8604	5.05444	16.608	9.80153	21.3119	16.4302	32.6134	5.08499	6.44547
55-60	69.9379	3.95241	2.21531	35.5684	5.30723	10.2999	19.2945	19.9998	13.5969	23.4158	3.10491	11.796	12.8141	6.71443	7.31665	15.162	8.69608		54.0675	44.8816	4.10471	3.39373	28.9121	59.7037	14.1384	14.9058	32.0338	12.6601	30.0445	18.7958	8.55481	18.1024	23.2297	11.713	76.5298	14.9959	12.5616	7.82037	13.9836	11.5764	8.34605	22.2176	10.4769	22.6823	12.8403	15.9005	6.12847	4.44541

## Sheet: Fig. 4B
	shSc+TAT																		shLAMTOR1+TAT																		shSc+TAT-2031
0-5	32.2137	86.7442	62.2986	28.1435	62.8298	54.5089	37.5799	49.6062	19.9617	21.1615	54.3591	36.0462	53.9349	54.8044					119.672	57.9739	143.915	44.7481	80.0165	69.2279	72.2979	109.087	87.6951	168.542	144.487	124.536	215.308	94.8812	104.918	85.348	69.0203		84.7863	69.2903	82.4402	89.0556	125.552	93.4977	45.341	78.5211	32.5452	26.2369	50.6442	128.656	104.651
5-10	33.8307	24.5382	47.3185	6.69487	25.4179	19.4759	15.4732	13.2798	19.5463	12.0179	47.7406	19.1036	25.4611	22.6417					72.5539	51.0379	37.6532	17.5215	78.1882	45.178	106.004	85.4317	65.9848	74.7867	115.314	90.3957	82.6682	47.6318	126.147	58.9779	77.6331		26.6056	17.3865	47.3103	81.3568	86.3556	103.046	21.3653	46.9936	63.1775	48.8916	21.4959	132.867	71.6629
10-15	22.0087	31.6347	25.0167	8.02749	24.8776	10.6531	14.9396	7.50299	13.1653	25.8301	35.6066	14.9994	3.31772	11.5669					34.5618	39.5567	18.2699	37.6581	62.5859	29.717	26.3179	40.9919	51.7413	47.126	43.5937	56.3644	18.964	47.5532	89.0632	30.7495	101.265		31.8533	27.312	64.1762	32.1434	27.0999	76.1412	46.214	32.7723	50.9447	27.7078	22.3307	97.0834	44.8453
15-20	27.6316	13.564	4.78561	18.3754	12.9946	11.7601	8.75695	42.8023	19.9404	20.2552	24.8098	2.20322	11.6867	9.84813					24.6101	21.8036	32.9684	22.6744	47.2359	27.2722	13.5685	27.1006	54.7718	51.5913	22.3473	94.321	16.7095	2.78541	89.8534	23.7477	44.1138		8.66861	9.16084	67.2351	27.4725	25.4769	39.2744	41.2561	43.4086	16.9687	42.1276	29.1592	75.5214	18.001
20-25	13.243	17.8494	8.69562	17.8537	14.3539	14.0487	5.17704	22.8656	12.7489	18.6849	7.22791	11.9272	6.71033	9.7524					19.1635	28.0154	13.5284	12.2333	44.0997	60.475	16.6096	46.6285	38.3625	28.8637	18.3007	62.8205	22.2418	18.44	132.713	29.3899	36.6151		9.2188	12.3216	45.5491	40.7569	10.3822	28.1742	29.1952	12.2495	7.17708	27.5488	42.7253	46.9758	24.934
25-30	6.19552	8.82177	6.92523	11.553	20.2888	7.76535	12.3699	5.60661	5.96284	18.4275	7.15262	4.4256	7.61931	5.56507					25.9259	24.816	8.17857	5.21597	35.8643	15.6984	3.90401	19.4734	48.062	21.4947	18.0516	46.0262	30.5667	3.97019	57.5954	20.396	16.3197		18.514	24.5925	48.7438	40.3081	40.0917	30.7243	26.5997	38.4832	12.7036	12.4481	15.6087	23.0154	16.969
30-35	9.29489	9.49612	10.0237	19.6895	13.4957	30.3186	10.5393	5.89295	5.67912	14.8196	3.66657	7.50925	5.06872	4.06569					20.1419	4.82287	11.3632	3.86767	42.622	44.9337	8.44486	9.18768	45.0738	28.545	11.7195	16.8193	33.7264	2.73764	53.1169	15.8452	43.0106		24.5999	11.7998	33.2911	29.4357	30.6593	28.1484	25.4351	28.6147	5.81468	15.7474	20.7522	28.4831	21.0622
35-40	5.02774	5.45586	6.39586	8.76403	8.08137	25.7273	3.3147	6.32603	2.59103	13.4953	1.78953	3.04957	8.36992	9.72248					6.87202	4.56436	21.9355	5.73773	45.7	10.7238	7.88138	27.9666	47.9058	19.1118	19.6276	48.0772	25.4711	8.1407	31.8585	5.5728	17.5505		28.9917	6.20885	32.99	27.5627	30.0454	26.2814	12.997	25.545	18.8496	13.7434	19.0717	22.7056	51.8868
40-45	7.98363	8.87694	21.3638	10.3079	5.60945	4.09353	9.20514	2.80492	1.92462	10.5649	2.82291	2.08849	2.01084	18.1804					16.3693	5.04869	13.6891	6.76536	38.6468	16.6308	3.95532	48.2515	77.2155	10.2343	18.2384	23.804	13.7399	19.5001	4.39836	4.70855	6.59664		20.1291	5.94345	33.3452	14.6171	15.0353	8.95625	22.3581	15.7798	25.7599	14.0827	13.5567	54.3744	17.8119
45-50	10.8467	6.60144	7.70105	12.7501	3.00565	11.8081	6.33291	4.76784	4.79918	6.66892	5.09496	5.05449	2.17731	10.4678					6.584	2.43926	4.0032	4.75486	44.6376	16.2355	8.06739	19.4247	36.3241	14.7014	19.9397	15.5415	12.5856	19.3756	2.14277	15.6852	4.75559		13.6264	8.87816	30.909	18.6578	16.1411	9.09228	29.5421	23.7532	6.08252	8.43646	17.9375	39.1825	10.8793
50-55	8.20049	9.7625	2.1357	13.5518	14.628	11.3305	3.57238	3.08648	2.6117	11.0911	4.74768	1.93483	1.96226	10.4793					10.4497	1.99551	10.394	11.206	8.9629	24.5337	9.07098	9.87319	19.4732	12.1989	11.6983	11.0184	12.2183	3.01104	1.83984	5.09087	8.41809		8.08113	3.24254	22.7061	38.4468	19.2404	5.96609	16.9574	19.3861	6.57408	8.07786	16.3629	30.2595	10.2833
55-60	5.15162	4.43934	5.28843	7.35227	6.9701	13.5287	6.84865	1.4908	3.98013	12.3186	3.28178	3.29033	3.03532	7.01277					9.01758	1.04632	1.91668	23.4969	53.8736	36.6951	11.4313	11.0785	23.9926	13.9008	9.45386	14.9386	14.215	3.25253	1.57994	1.57391	2.77145		1.48643	3.93546	24.8735	14.9091	4.93087	9.13013	8.84858	9.758	5.09062	12.6155	25.3455	19.4827	15.7439
[truncated: 16 more columns]

## Sheet: Fig. 4C
	shSc																		shLAMTOR1																		shSc+CilioD
0-5	121.294	14.1143	18.6935	72.9214	51.4688	30.5731	27.6526	15.5993	44.5166	68.2289	25.6967	89.1762	98.3496	38.7922	18.3801	32.8958	32.3001		196.666	153.833	132.234	28.3914	103.608	250.821	89.5215	47.2165	52.1389	51.8048	141.061	182.814	109.939	57.0692	87.2372	90.2417	118.767	67.4705	12.0026	14.9006	49.2976	83.9527	51.4971	41.7499	46.7027	58.1544	9.26565	66.4778
5-10	106.988	8.72869	6.72317	59.9015	27.4217	45.9908	31.3293	12.2396	45.615	58.915	26.1896	35.4348	43.1759	52.7946	26.6743	20.3114	26.6124		173.709	143.782	48.9237	37.4013	78.8566	210.116	48.0301	91.9794	30.0391	60.4711	113.776	110.155	83.6063	31.5411	109.824	105.407	104.598	80.8241	13.2038	10.342	8.62947	28.4383	24.6324	21.2816	23.5914	33.915	25.8384	18.5274
10-15	109.199	10.7694	3.63032	65.3535	16.9123	80.9168	19.8684	18.7963	52.4118	56.6439	14.4668	21.1533	23.4412	16.6004	39.8035	17.3528	11.5299		125.816	83.192	48.4317	58.3449	69.9531	152.263	65.6279	75.4866	69.5011	26.7191	113.873	140.986	22.3908	28.4704	43.781	98.9199	93.4853	95.0255	9.01044	9.6403	12.1607	45.1273	10.0135	16.6725	38.0789	41.0553	13.0808	12.4261
15-20	94.9981	8.86921	2.68949	55.7244	14.3506	37.1076	16.9563	25.8698	28.0955	51.6945	19.7731	12.3663	13.6927	45.6756	29.0067	17.4926	12.3515		107.874	47.083	33.8517	25.1939	67.1073	133.941	25.7998	79.8308	75.073	16.0497	47.7294	122.968	29.5311	20.4034	32.3394	40.1583	70.0097	43.6729	13.6524	8.86039	5.29097	10.3114	20.3317	18.8495	12.3687	17.4262	7.14373	11.0206
20-25	78.5637	5.63861	2.66494	41.1892	16.8124	29.4051	26.3272	17.7588	22.2722	23.1948	15.036	10.504	10.9922	18.0659	22.9029	23.4509	16.1747		91.4971	41.8466	25.4155	18.6391	48.8004	88.2096	31.4447	63.6865	51.6126	16.2037	47.6324	41.5613	17.263	13.1746	21.5781	24.7411	95.6777	24.6604	11.3269	5.23198	6.42028	12.682	13.9742	9.16	9.72213	25.2441	8.79834	4.96609
25-30	65.4763	7.54016	3.7548	45.8814	10.4806	26.797	22.5417	15.9404	27.3711	13.8517	13.2758	17.2642	17.5227	14.7043	15.219	27.3107	16.6956		72.6838	47.5199	8.30783	9.05369	65.8618	81.8807	17.7453	44.8014	33.3963	19.6055	50.8302	18.9211	10.7988	14.4623	35.0419	41.8482	40.8528	13.3559	5.02412	7.93239	7.50599	13.2409	5.60395	10.0204	6.65522	9.96962	9.02495	7.99416
30-35	65.1568	10.1872	3.59334	38.6683	11.5477	15.0483	12.6226	14.9157	27.3909	27.0166	4.66163	15.6018	16.3459	12.8671	11.4209	12.4931	15.2954		60.7968	49.4905	7.60637	6.90167	67.8471	66.0942	25.4576	32.487	32.4843	14.2622	46.5448	17.1825	15.3526	22.3949	27.729	20.9332	86.867	27.9344	7.96966	12.2674	6.47483	12.1984	8.3015	7.62382	6.36918	24.6826	9.60264	22.7427
35-40	67.0663	6.13531	2.08674	32.9929	9.85999	18.4431	16.6033	20.7283	20.7715	49.2564	5.22699	11.092	11.2041	14.8089	15.9458	9.24198	9.95856		121.306	46.5996	4.85989	15.7031	53.0064	61.2691	27.7928	56.6119	13.3744	16.8501	30.8277	33.697	18.2314	11.4974	34.8032	25.7698	78.889	27.9845	5.93443	5.71092	8.05321	10.6945	9.38474	9.07456	8.42864	18.3232	10.4838	9.07497
40-45	52.2118	12.9647	2.31711	37.5336	5.03952	17.3479	16.3512	15.0487	30.9351	17.85	11.4791	6.53143	8.41136	19.7792	12.643	14.1548	10.5426		41.9089	35.6221	8.31193	6.62731	43.0814	65.6378	20.3316	21.1718	11.2967	16.8315	38.5955	16.2686	22.9357	18.9146	21.7043	8.42626	62.4838	21.043	7.70419	5.54138	6.40221	10.8277	10.3604	11.2095	7.97267	9.46392	8.51646	5.50656
45-50	62.7142	6.10181	2.56972	51.1996	11.1201	16.6673	13.7319	8.37544	6.20846	10.1331	12.4107	6.03588	7.44001	21.2888	9.21676	18.1041	7.79821		38.0007	46.9169	12.4592	5.30732	46.3031	54.5177	12.7127	38.738	16.7217	22.9128	27.6029	11.0713	12.3258	19.57	37.8499	36.0921	44.572	17.6182	5.57515	7.48051	9.74215	10.5066	4.16305	19.2088	7.95166	4.81153	10.2233	7.05755
50-55	53.2576	5.20588	2.83404	42.2776	6.02376	17.29	17.1321	10.7074	6.04769	15.7882	11.6503	5.96497	4.88721	11.1445	9.06098	5.95749	7.2765		43.0061	44.3066	9.47952	3.73964	51.2968	58.1943	10.4561	18.8249	34.2204	18.8895	28.9318	18.3661	7.11114	18.7326	26.1045	28.0593	49.5471	14.7236	5.60303	5.32381	6.11172	6.50058	7.95166	10.4537	4.77164	5.25794	10.9936	8.68837
55-60	69.9379	3.95241	2.21531	35.5684	5.30723	10.2999	19.2945	19.9998	13.5969	23.4158	3.10491	11.796	12.8141	6.71443	7.31665	15.162	8.69608		54.0675	44.8816	4.10471	3.39373	28.9121	59.7037	14.1384	14.9058	32.0338	12.6601	30.0445	18.7958	8.55481	18.1024	23.2297	11.713	76.5298	14.9959	6.83567	14.633	6.17372	6.39264	4.77164	7.02308	1.80466	3.33629	8.97562	7.90447
